# Supplementary material for: Low-Dose Abdominal CT for Evaluating Suspected Appendicitis in Adolescents and Young Adults: Review of Evidence
Source: PubMed Central journal article supplement — Korean J Radiol. 2022 Jan 27;23(5):517–28. doi: 10.3348/kjr.2021.0596 (PMC9081692; doi:10.3348/kjr.2021.0596), 2022-01-27
Supplement: kjr-23-517-s001.pdf [file kjr-23-517-s001.pdf]

## SUPPLEMENT

**Supplementary Table 1. An Example of CT Imaging Parameters**

| Parameter                                | Machine                                                             |
|------------------------------------------|---------------------------------------------------------------------|
| CT machine                               | Brilliance iCT, Philips Healthcare                                  |
| <b>Scanning</b>                          |                                                                     |
| Tube potential, kVp                      | 120                                                                 |
| Reference tube-current-time product, mAs | 55                                                                  |
| Tube current modulation                  | Patient-to-patient modulation, z-axis modulation                    |
| Range                                    | From 4 cm above the liver dome to 1 cm below the ischial tuberosity |
| Detector collimation, mm                 | 128 x 0.625, double sampling                                        |
| Rotation speed, seconds                  | 0.5                                                                 |
| Pitch                                    | 0.99                                                                |
| <b>Reconstruction</b>                    |                                                                     |
| Thick transverse images                  | Section thickness, 4 mm; interval, 3 mm                             |
| Thin transverse images                   | Section thickness, 2 mm; interval, 1 mm                             |
| Coronal reformation                      | Section thickness, 4 mm; interval, 3 mm                             |
| Iterative reconstruction                 | iDose <sup>4</sup>                                                  |
